# Supplementary material
Source: publisher figshare collection journal article supplement (https://acs.figshare.com/ndownloader/files/3960916)
Supplement: Supplementary file 1 [file 3960916]

## **Supporting Information**

### **Chitosan: An efficient, reusable and biodegradable catalyst for green synthesis of heterocycles**

Pramod K. Sahu,<sup>\*a,b</sup> Praveen K. Sahu,<sup>\*b,c</sup> Sushil K. Gupta,<sup>a,b</sup> Dau D. Agarwal<sup>a,b,c</sup>

<sup>a</sup>*School of Studies in Chemistry, Jiwaji University, Gwalior-474011, Madhya Pradesh, India*

<sup>b</sup>*Department of Industrial Chemistry, Jiwaji University, Gwalior-474011, Madhya Pradesh, India*

<sup>c</sup>*Jagdishprasad Jhabarmal Tibrewala University, Jhunjhunu-333001, Rajasthan-333001, India*

\*To whom correspondence should be addressed: Telephone: +91-9993932425, +91-8826757921; Email: [sahu.chemistry@gmail.com](mailto:sahu.chemistry@gmail.com), [researchdata6@gmail.com](mailto:researchdata6@gmail.com) (Pramod K. Sahu), [praveensahu1234@gmail.com](mailto:praveensahu1234@gmail.com) (Praveen K. Sahu)

#### **Table of Contents**

| <b>Contents</b>       | <b>Page No.</b> |
|-----------------------|-----------------|
| Experiment Tables     | S2              |
| Characterization Data | S3-S8           |

## Experimental Protocols

### *General*

The  $^1\text{H}$  NMR spectra were measured by BRUKER AVANCE II 400 NMR spectrometer with tetramethylsilane as an internal standard at 20-25  $^{\circ}\text{C}$ ; data for  $^1\text{H}$  NMR are reported as follow: chemical shift (ppm), integration, multiplicity (s, singlet; d, doublet; t, triplet; q, quartet; m, multiplet and br, broad), coupling constant (Hz). IR spectra were recorded by SHIMADZU; IR spectrometer of sample dispersed in KBr pellet or nujol and is reported in terms of frequency of absorption ( $\text{cm}^{-1}$ ). E-Merck pre-coated TLC plates, RANKEM silica gel G for preparative thin-layer chromatography were used. Melting points were determined in open capillaries and was uncorrected. 2-Amino benzothiazole was purchased from Sigma Aldrich and other chemical were purchased from Himedia, Mumbai India and used without any purifications.

### *Typical procedure for synthesis*

A mixture of aldehydes (5 mmol), dicarbonyl (5 mmol) and urea/thiourea/2-amino benzothiazole/3-amino-1,2,4-triazole (5 mmol) was refluxed at 60-65  $^{\circ}\text{C}$  in the presence chitosan catalyst in 10 mL aqueous solution of 2% acetic acid. The reaction was monitored by TLC. After completion the reaction, mixture was filtered. The residue was purified via column chromatography on silica gel using DCM:Toluene (3:2). The heterocyclic derivatives were collected as solid and filtrate has chitosan catalyst reused as such for next run.

## **Characterization Data**

### **Ethyl-2-methyl-4-(phenyl)-4H-pyrimido[2,1-b][1,3]benzothiazole-3-carboxylate (1a).**

Pale-yellow crystals, mp 178-180 °C,  $R_f$  = 0.47 (DCM:Toluene; 3:2); IR (KBr) ( $\nu_{\max}$ ,  $\text{cm}^{-1}$ ): 3043 ( $\text{C-H}_{\text{str}}$ ), 2968 ( $\text{C-H}_{\text{str}}$  in  $\text{CH}_2\text{CH}_3$ ), 1670 ( $\text{C=O}_{\text{str}}$ ), 1589 ( $\text{C=N}_{\text{str}}$ ), 1462 ( $\text{C=C}_{\text{str}}$ ), 744 ( $\text{C-H}_{\text{def}}$ );  $^1\text{H}$  NMR (400 MHz,  $\text{CDCl}_3$ ):  $\delta_{\text{H}}$  1.29 (3H, t,  $J_{\text{HH}} = 7.12$  Hz,  $\text{CH}_2\text{CH}_3$ ), 2.46 (3H, s,  $\text{CH}_3$ ), 4.17 (2H, m,  $\text{CH}_2\text{CH}_3$ ), 6.39 (1H, s,  $-\text{CH}$ ), 7.07-7.43 (9H, m,  $\text{ArH}$ );  $^{13}\text{C}$  NMR (100 MHz, DMSO): 165.44, 162.59, 154.04, 141.26, 137.43, 128.26, 126.79, 122.22, 111.65, 102.56, 59.35, 56.82, 23.17, 13.99; ESI-MS:  $m/z$  Calculated for  $\text{C}_{20}\text{H}_{18}\text{N}_2\text{O}_2\text{S}$  350.44, Found  $[\text{M}+\text{H}]^+$  351.2; C, H and N analyses Calculated for C 68.48, H 5.13, N 7.98, Found C 68.78, H 5.38, N 7.89.

### **Ethyl-2-methyl-4-(4-hydroxy-3-methoxy phenyl)-4H-pyrimido[2,1-b][1,3]benzothiazole-3-carboxylate (1b).**

Pale-yellow powder, mp 192-194 °C,  $R_f$  = 0.53 (DCM:Toluene; 3:2); IR (KBr) ( $\nu_{\max}$ ,  $\text{cm}^{-1}$ ): 3360 ( $\text{OH}^{\text{str}}$ ), 3059 ( $\text{C-H}_{\text{str}}$ ), 2983 ( $\text{C-H}_{\text{str}}$  in  $\text{CH}_2\text{CH}_3$ ), 1703 ( $\text{C=O}_{\text{str}}$ ), 1597 ( $\text{C=N}_{\text{str}}$ ), 1504 ( $\text{C=C}_{\text{str}}$ ), 740 ( $\text{C-H}_{\text{def}}$ );  $^1\text{H}$  NMR (400 MHz,  $\text{CDCl}_3$ ):  $\delta_{\text{H}}$  1.31 (3H, t,  $J_{\text{HH}} = 7.12$  Hz,  $\text{CH}_2\text{CH}_3$ ), 2.47 (3H, s,  $\text{CH}_3$ ), 3.8 (3H, s,  $\text{Ar-OCH}_3$ ), 4.12-4.19 (2H, m,  $\text{CH}_2\text{CH}_3$ ), 6.36 (1H, s,  $-\text{CH}$ ), 6.78 (1H, d,  $J_{\text{HH}} = 5.6$  Hz,  $\text{ArH}$ ), 6.89-6.92 (2H, m,  $\text{ArH}$ ), 7.13-7.31 (4H, m,  $\text{ArH}$ ), 9.80 (1H, s,  $\text{OH}$ );  $^{13}\text{C}$  NMR (100 MHz, DMSO): 165.60, 162.34, 153.51, 147.12, 146.42, 137.61, 132.52, 126.37, 122.21, 115.18, 111.92, 110.88, 59.28, 55.43, 23.09, 14.08; ESI-MS:  $m/z$  Calculated for  $\text{C}_{21}\text{H}_{20}\text{N}_2\text{O}_4\text{S}$  396.49, Found  $[\text{M}+\text{H}]^+$  397.2; C, H and N analyses Calculated for C 63.55, H 5.04, N 7.06, Found C 63.68, H 5.16, N 7.13.

### **Ethyl-2-methyl-4-(4-dimethylamino phenyl)-4H-pyrimido[2,1-b][1,3]benzothiazole-3-carboxylate (1c).**

Pale-yellow powder, mp 230-232 °C,  $R_f = 0.57$  (DCM:Toluene; 3:2); IR (KBr) ( $\nu_{\max}$ ,  $\text{cm}^{-1}$ ): 3059 ( $\text{C-H}_{\text{str}}$ ), 2897 ( $\text{C-H}_{\text{str}}$  in  $\text{CH}_2\text{CH}_3$ ), 1612 ( $\text{C=O}_{\text{str}}$ ), 1581 ( $\text{C=N}_{\text{str}}$ ), 1431 ( $\text{C=C}_{\text{str}}$ ), 815-754 ( $\text{C-H}_{\text{def}}$ );  $^1\text{H}$  NMR (400 MHz,  $\text{CDCl}_3$ ):  $\delta_{\text{H}}$  1.29 (3H, t,  $J_{\text{HH}} = 7.12$  Hz,  $\text{CH}_2\text{CH}_3$ ), 2.86 (3H, s,  $\text{CH}_3$ ), 3.06 (6H, s,  $\text{N}(\text{CH}_3)_2$ ), 4.15 (2H, m,  $\text{CH}_2\text{CH}_3$ ), 6.71-7.5 (4H, m,  $\text{ArH}$ ), 7.71-7.92 (4H, m,  $\text{ArH}$ );  $^{13}\text{C}$  NMR (100 MHz, DMSO): 166.39, 165.44, 153.95, 152.63, 133.43, 127.71, 125.91, 124.45, 121.63, 120.57, 23.13, 13.60; ESI-MS:  $m/z$  Calculated for  $\text{C}_{22}\text{H}_{23}\text{N}_3\text{O}_2\text{S}$  393.54, Found  $[\text{M}+\text{H}]^+$  394.2; C, H and N analyses Calculated for C 67.08, H 5.84, N 10.67, Found C 67.16, H 5.98, N 10.75.

**Ethyl-2-methyl-4-(4-nitro phenyl)-4H-pyrimido[2,1-b][1,3]benzothiazole-3-carboxylate (1d).**

Yellow powder, mp 148-149 °C,  $R_f = 0.52$  (DCM:Toluene; 3:2); IR (KBr) ( $\nu_{\max}$ ,  $\text{cm}^{-1}$ ): 3348 ( $\text{C-H}_{\text{str}}$ ), 2933 ( $\text{C-H}_{\text{str}}$  in  $\text{CH}_2\text{CH}_3$ ), 1625 ( $\text{C=O}_{\text{str}}$ ), 1510 ( $\text{NO}_{2\text{str}}$ ), 1267 ( $\text{C=C}_{\text{str}}$ ), 962-812 ( $\text{C-H}_{\text{def}}$ );  $^1\text{H}$  NMR (400 MHz,  $\text{CDCl}_3$ ):  $\delta_{\text{H}}$  1.31 (3H, s,  $\text{CH}_2\text{CH}_3$ ), 2.46 (3H, s,  $\text{CH}_3$ ), 4.15 (2H, m,  $\text{CH}_2\text{CH}_3$ ), 6.52 (1H, s,  $-\text{CH}$ ), 7.03-7.63 (8H, m,  $\text{ArH}$ );  $^{13}\text{C}$  NMR (100 MHz,  $\text{CDCl}_3$ ): 166.25, 163.56, 155.83, 147.95, 147.62, 137.44, 128.06, 126.88, 124.43, 124.01, 123.73, 122.47, 111.36, 102.01, 60.42, 57.03, 23.97, 14.40; ESI-MS:  $m/z$  Calculated for  $\text{C}_{20}\text{H}_{17}\text{N}_3\text{O}_4\text{S}$  395.46, Found  $[\text{M}+\text{H}]^+$  396.4; C, H and N analyses Calculated for C 60.69, H 4.29, N 10.62, Found C 60.78, H 4.35, N 10.70.

**Ethyl-2-methyl-4-(2-hydroxy phenyl)-4H-pyrimido[2,1-b][1,3]benzothiazole-3-carboxylate (1e).**

Pale-yellow powder, mp 210-212 °C,  $R_f = 0.59$  (DCM:Toluene; 3:2); IR (KBr) ( $\nu_{\max}$ ,  $\text{cm}^{-1}$ ): 3288 ( $\text{OH}_{\text{str}}$ ), 3059 ( $\text{C-H}_{\text{str}}$ ), 2897 ( $\text{C-H}_{\text{str}}$  in  $\text{CH}_2\text{CH}_3$ ), 1612 ( $\text{C=O}_{\text{str}}$ ), 1581 ( $\text{C=N}_{\text{str}}$ ), 1431 and 1377 ( $\text{C=C}_{\text{str}}$ ), 815-754 ( $\text{C-H}_{\text{def}}$ );  $^1\text{H}$  NMR (400 MHz,  $\text{CDCl}_3$ ):  $\delta_{\text{H}}$  1.25 (3H, t,  $J_{\text{HH}} = 4.76$  Hz,

CH<sub>3</sub>CH<sub>2</sub>), 2.35 (3H, s, CH<sub>3</sub>), 4.04-4.12 (m, 2H, CH<sub>3</sub>CH<sub>2</sub>), 6.30 (1H, s, -CH), 6.66 (2H, d,  $J_{\text{HH}} = 8.40$  Hz, ArH), 7.13-7.59 (4H, m, ArH), 7.59 (1H, d,  $J_{\text{HH}} = 7.76$  Hz, ArH), 9.26 (1H, s, OH); <sup>13</sup>C NMR (100 MHz, DMSO): 165.55, 162.27, 157.22, 153.46, 137.56, 131.95, 128.13, 126.34, 123.57, 122.94, 122.20, 115.02, 111.80, 102.96, 59.27, 56.37, 23.09, 14.03; ESI-MS: m/z Calculated for C<sub>20</sub>H<sub>18</sub>N<sub>2</sub>O<sub>3</sub>S 367.34, Found [M]<sup>+</sup> 367.2; C, H and N analyses Calculated for C 65.49, H 4.91, N 7.64, Found C 65.51, H 4.95, N 7.62.

**Ethyl-2-methyl-4-(4-hydroxy phenyl)-4H-pyrimido[2,1-b][1,3]benzothiazole-3-carboxylate (1f).**

Pale-yellow powder, mp 210-212 °C,  $R_f = 0.59$  (DCM:Toluene; 3:2); IR (KBr) ( $\nu_{\text{max}}$ , cm<sup>-1</sup>): 3288 (OH<sub>str</sub>), 3059 (C-H<sub>str</sub>), 2897 (C-H<sub>str</sub> in CH<sub>2</sub>CH<sub>3</sub>), 1612 (C=O<sub>str</sub>), 1581 (C=N<sub>str</sub>), 1431 and 1377 (C=C<sub>str</sub>), 815-754 (C-H<sub>def</sub>); <sup>1</sup>H NMR (400 MHz, CDCl<sub>3</sub>):  $\delta_{\text{H}}$  1.25 (3H, t,  $J_{\text{HH}} = 14.16$  Hz, CH<sub>3</sub>CH<sub>2</sub>), 2.35 (3H, s, CH<sub>3</sub>), 4.04-4.12 (m, 2H, CH<sub>3</sub>CH<sub>2</sub>), 6.30 (1H, s, -CH), 6.66 (2H, d,  $J_{\text{HH}} = 8.40$  Hz, ArH), 7.13-7.59 (5H, m, ArH), 7.59 (1H, d,  $J_{\text{HH}} = 7.76$  Hz, ArH), 9.26 (1H, s, OH); <sup>13</sup>C NMR (100 MHz, DMSO): 165.55, 162.27, 157.22, 153.46, 137.56, 131.95, 128.13, 126.34, 123.57, 122.94, 122.20, 115.02, 111.80, 102.96, 59.27, 56.37, 23.09, 14.03; ESI-MS: m/z Calculated for C<sub>20</sub>H<sub>18</sub>N<sub>2</sub>O<sub>3</sub>S 367.34, Found [M]<sup>+</sup> 367.2; C, H and N analyses Calculated for C 65.49, H 4.91, N 7.64, Found C 65.51, H 4.95, N 7.62.

**Ethyl-2-methyl-4-(4-methoxy phenyl)-4H-pyrimido[2,1-b][1,3]benzothiazole-3-carboxylate (1g).**

Pale-yellow powder, mp 130-132 °C,  $R_f = 0.53$  (DCM:Toluene; 3:2); IR (KBr) ( $\nu_{\text{max}}$ , cm<sup>-1</sup>): 2941 (C-H<sub>str</sub> in CH<sub>2</sub>CH<sub>3</sub>), 1627 (C=O<sub>str</sub>), 1508 (C=N<sub>str</sub>), 1280 (C=C<sub>str</sub>), 962-813 (C-H<sub>def</sub>); <sup>1</sup>H NMR (400 MHz, CDCl<sub>3</sub>):  $\delta_{\text{H}}$  1.28 (3H, t,  $J_{\text{HH}} = 4.76$  Hz, CH<sub>3</sub>CH<sub>2</sub>), 2.45 (3H, s, CH<sub>3</sub>), 3.71 (3H, s, Ar-OCH<sub>3</sub>), 4.11-4.21 (2H, m, CH<sub>3</sub>CH<sub>2</sub>), 6.34 (1H, s, -CH), 6.78 (2H, d,  $J_{\text{HH}} = 8.64$  Hz, ArH), 7.21-

7.58 (6H, m, ArH);  $^{13}\text{C}$  NMR (100 MHz, DMSO): 166.67, 163.27, 159.42, 154.51, 152.07, 138.06, 133.81, 128.51, 126.57, 123.88, 123.82, 122.14, 120.89, 119.04, 113.90, 111.80, 103.24, 60.09, 57.20, 55.18, 23.73, 14.40; ESI-MS:  $m/z$  Calculated for  $\text{C}_{21}\text{H}_{20}\text{N}_2\text{O}_2\text{S}$  380.47, Found  $[\text{M}+\text{H}]^+$  381.3; C, H and N analyses Calculated for C 66.23, H 5.25, N 7.35, Found C 66.26, H 5.27, N 7.35.

**Ethyl-2-methyl-4-(2, 6-dichloro phenyl)-4H-pyrimido[2,1-b][1,3]benzothiazole-3-carboxylate (1h).**

Pale-yellow powder, mp 150-152 °C,  $R_f$  = 0.56 (DCM:Toluene; 3:2); IR (KBr) ( $\nu_{\text{max}}$ ,  $\text{cm}^{-1}$ ): 3012 (C-H<sub>str</sub>), 2922 (C-H<sub>str</sub> in  $\text{CH}_2\text{CH}_3$ ), 1625 (C=O<sub>str</sub>), 1500 (C=N<sub>str</sub>), 1278 (C=C<sub>str</sub>), 960-812 (C-H<sub>def</sub>);  $^1\text{H}$  NMR (400 MHz, DMSO):  $\delta_{\text{H}}$  1.09 (3H, t,  $J_{\text{HH}}$  = 4.76 Hz,  $\text{CH}_2\text{CH}_3$ ), 2.47 (3H, s,  $\text{CH}_3$ ), 4.04 (2H, m,  $\text{CH}_2\text{CH}_3$ ), 7.01-7.66 (7H, m, Ar-H);  $^{13}\text{C}$  NMR (100 MHz, DMSO): 171.88, 165.92, 162.99, 151.33, 137.57, 133.73, 132.41, 129.14, 126.08, 125.57, 124.52, 122.97, 121.69, 117.66, 116.07, 59.26, 23.11, 14.04; ESI-MS:  $m/z$  Calculated for  $\text{C}_{20}\text{H}_{16}\text{N}_2\text{Cl}_2\text{O}_2\text{S}$  419.41, Found  $[\text{M}]^+$  419.6; C, H and N analyses Calculated for C 57.22, H 3.81, N 6.77, Found C 57.19, H 3.84, N 6.76.

**6,6-dimethyl-9-phenyl-5,6,7,9-tetrahydro-4H-1,2,4-triazolo[5,1-b]quinazolin-8-one (2a)**

White powder, mp 230-232 °C,  $R_f$  = 0.58 (DCM:Toluene 3:2); IR (KBr) ( $\nu_{\text{max}}$ ,  $\text{cm}^{-1}$ ): 2850 (C-H<sub>str</sub>), 1645 (C=O<sub>str</sub>), 1587 (C-H<sub>def</sub>), 1483 (C-H<sub>def</sub>), 1454 (C=C<sub>str</sub>), 1270 (C-N<sub>str</sub>).  $^1\text{H}$  NMR (400 MHz,  $\text{CDCl}_3$ ):  $\delta_{\text{H}}$  0.96 (s, 3H,  $\text{CH}_3$ ), 1.05 (s, 3H,  $\text{CH}_3$ ), 2.17 (d, 1H,  $J_{\text{HH}}$  = 6.52 Hz, H-5), 2.19 (d, 1H,  $J_{\text{HH}}$  = 12.52 Hz, H-5'), 2.23-2.59 (m, 2H, H-7), 6.44 (s, 1H, H-9), 7.07-7.48 (m, 5H, ArH), 7.66 (s, 1H, H-2), 8.1 (s, 1H, NH); ESI-MS:  $m/z$  Calculated for  $\text{C}_{17}\text{H}_{18}\text{N}_4\text{O}$  294.34, Found  $[\text{M}+\text{H}]^+$  295; C, H and N analyses Calculated for C 69.30, H 6.11, N 19.02, Found C 69.46, H 6.19, N 19.09.

**6,6-dimethyl-9-(2-hydroxy-phenyl)-5,6,7,9-tetrahydro-4H-1,2,4-triazolo[5,1-b]quinazolin-8-one (2b)**

White powder, mp 112-114 °C,  $R_f$  = 0.56 (DCM:Toluene 3:2); IR (KBr) ( $\nu_{\max}$ ,  $\text{cm}^{-1}$ ): 2850 (C-H<sub>str</sub>), 1625 (C=O<sub>str</sub>), 1585 (C-H<sub>def</sub>), 1510 (C-H<sub>def</sub>), 1427 (C=C<sub>str</sub>), 1269 (C-N<sub>str</sub>), 864-1124 (C-H<sub>def</sub>). NMR (400 MHz, CDCl<sub>3</sub>):  $\delta_H$  0.98, (s, 3H, CH<sub>3</sub>), 1.02, (s, 3H, CH<sub>3</sub>), 2.33 (d, 1H,  $J_{HH}$  = 3.36 Hz, H-5), 2.4 (d, 1H,  $J_{HH}$  = 1.80 Hz, H-5'), 2.57-2.78 (m, 2H, H-7), 6.49 (s, 1H, H-9), 6.85-7.36 (m, 5H, ArH), 7.62 (s, 1H, H-2), 8.29 (s, 1H, NH), 9.18 (s, 1H, OH); ESI-MS: m/z Calculated for C<sub>17</sub>H<sub>18</sub>N<sub>4</sub>O<sub>2</sub> 310.3, Found [M-H]<sup>+</sup> 309; C, H and N analyses Calculated for C 65.74, H 5.80, N 18.04, Found C 65.89, H 5.76, N 18.16.

**4-(2-hydroxy phenyl)-7,7-dimethyl-5-oxo-1,2,3,4,5,6,7,8-octahydroquinazoline-2,5-dione (3a)**

White powder, mp 140-142 °C,  $R_f$  = 0.57 (DCM:Toluene 3:2); IR (KBr) ( $\nu_{\max}$ ,  $\text{cm}^{-1}$ ): 3404 (OH<sub>str</sub>), 2850 (C-H<sub>str</sub>), 1615 (C=O<sub>str</sub>), 1575 (C-H<sub>def</sub>), 1510 (C-H<sub>def</sub>), 1427 (C=C<sub>str</sub>), 1269 (C-N<sub>str</sub>), 864 (C-H<sub>def</sub>). <sup>1</sup>H NMR (400 MHz, CDCl<sub>3</sub>):  $\delta_H$  0.99 (s, 3H, CH<sub>3</sub>) 1.07 (s, 1H, CH<sub>3</sub>), 2.14 (s, 1H, CH<sub>2</sub>), 2.4 (s, 2H, CH<sub>2</sub>), 5.54 (s, 1H, CH), 7.08-7.48 (m, 4H, ArH), 8.1 (broad band, 2H, NH), 11.91 (s, 1H, OH); ESI-MS: m/z Calculated for C<sub>16</sub>H<sub>18</sub>N<sub>2</sub>O<sub>3</sub> 286.36 Found [M-H]<sup>+</sup> 285.3; C, H and N analyses Calculated for C 67.04, H 6.28, N 9.77, Found C 67.16, H 6.22, N 9.91.

**4-phenyl-7,7-dimethyl-5-oxo-1,2,3,4,5,6,7,8-octahydroquinazoline-2-thione (3b)**

White powder, mp 162-164 °C,  $R_f$  = 0.56 (DCM:Toluene 3:2); IR (KBr) ( $\nu_{\max}$ ,  $\text{cm}^{-1}$ ): 2650 (C-H<sub>str</sub>), 1645 (C=O<sub>str</sub>), 1587 (C-H<sub>def</sub>), 1554 (C-H<sub>def</sub>), 1483 (C=C<sub>str</sub>). NMR (400 MHz, CDCl<sub>3</sub>):  $\delta_H$  0.98 (s, 3H, CH<sub>3</sub>), 1.10 (s, 3H, CH<sub>3</sub>), 2.22 (s, 1H, CH<sub>2</sub>), 2.46 (s, 1H, CH<sub>2</sub>), 4.74 (1H, s, CH), 7.08-7.48 (m, 5H, ArH), 8.08 (broad band, 2H, NH); ESI-MS: m/z Calculated for C<sub>16</sub>H<sub>18</sub>N<sub>2</sub>OS

286.38 Found  $[M-H]^+$  285.3; C, H and N analyses Calculated for C 67.04, H 6.28, N 9.77, Found C 67.21, H 6.33, N 9.89

**12-phenyl-substituted-2,3,4,12-tetrahydrobenzo[4,5]thiazolo[2,3-b]quinazolin-1-one (4a)**

Pale yellow powder, mp 230-232 °C,  $R_f$  = 0.53 (DCM:Toluene 3:2); IR (KBr) ( $\nu_{\max}$ ,  $\text{cm}^{-1}$ ): 3007 (C-H<sub>str</sub>), 2922 (C-H<sub>str</sub>), 1625 (C=O<sub>str</sub>), 1510 (C-H<sub>def</sub>), 1267 (C-H<sub>def</sub>), 1122 (C=S<sub>str</sub>), 962-812 (C-H<sub>str</sub>);  $^1\text{H}$  NMR (400 MHz,  $\text{CDCl}_3$ ):  $\delta_{\text{H}}$  0.93 (s, 3H, CH<sub>3</sub>), 1.09 (s, 3H, CH<sub>3</sub>), 2.18-2.30 (m, 2H, CH<sub>2</sub>), 2.52 (s, 2H, CH<sub>2</sub>), 6.53 (s, 1H, C-H), 7.17-7.53 (m, 9H, ArH); ESI-MS: m/z Calculated for  $\text{C}_{22}\text{H}_{20}\text{N}_2\text{OS}$  360.42 Found  $[M+H]^+$  361.3; C, H and N analyses Calculated for C 73.24, H 5.54, N 7.76, Found C 73.29, H 5.65, N 7.83.

**Knoevenagel intermediate**

Off white powder, mp 78-80 °C,  $^1\text{H}$ -NMR (400 MHz,  $\text{CDCl}_3$ ): H ppm 1.29 (3H, t,  $J$  = 14.24 Hz,  $\text{CH}_2\text{CH}_3$ ), 2.46 (3H, s,  $\text{CH}_3$ ), 4.17 (2H, m,  $\text{CH}_2\text{CH}_3$ ), 6.39 (1H, s, =CH), 7.07-7.43 (5H, m, Ar-H);  $^{13}\text{C}$  NMR (100 MHz,  $\text{CDCl}_3$ ): 200.71, 164.16, 140.09, 137.16, 134.65, 134.01, 132.73, 129.49, 128.75, 61.29, 29.72, 13.71; ESI-MS: m/z Calculated for  $\text{C}_{13}\text{H}_{14}\text{O}_3$  218.3, Found  $[M+H]^+$  219.5.
